# Supplementary material
Source: MDPI journal article supplement (https://www.mdpi.com/2075-4655/1/3/24)
Supplement: s1 [file s1]

# AIECs methylated TS/mRNA overlaps - Treatments

| Treatment vs. Vehicle per Time Point | Regulation  | methylated target/ mRNA Overlap | P-Value | Ratio | Pathways |
|--------------------------------------|-------------|---------------------------------|---------|-------|----------|
| Isotretinoin at 2 weeks              | Induction   | il12rb1                         | -       | -     | -        |
|                                      | Suppression | -                               | -       | -     | -        |

# BIECs microRNA TS/mRNA overlaps - Treatments

| Treatment vs. Vehicle per Time Point | Regulation  | microRNA target/ mRNA Overlaps                                                                                                                                                                                                                                                                                                                                                                                                                                                                                                                                                                                                                                                                     | P-Value  | Ratio | Pathways                                                                     |
|--------------------------------------|-------------|----------------------------------------------------------------------------------------------------------------------------------------------------------------------------------------------------------------------------------------------------------------------------------------------------------------------------------------------------------------------------------------------------------------------------------------------------------------------------------------------------------------------------------------------------------------------------------------------------------------------------------------------------------------------------------------------------|----------|-------|------------------------------------------------------------------------------|
| Isotretinoin at 2 weeks              | Induction   | -                                                                                                                                                                                                                                                                                                                                                                                                                                                                                                                                                                                                                                                                                                  | -        | -     | -                                                                            |
|                                      | Suppression | -                                                                                                                                                                                                                                                                                                                                                                                                                                                                                                                                                                                                                                                                                                  | -        | -     | -                                                                            |
| Isotretinoin at 6 weeks              | Induction   | -                                                                                                                                                                                                                                                                                                                                                                                                                                                                                                                                                                                                                                                                                                  | -        | -     | -                                                                            |
|                                      | Suppression | A530054k11rik, abcc9, abtb2, ankrd12, anks4b, atp7b, banp, bhlha15, ccdc116, cdy12, chordc1, clca5, cyp2d9, ddx60, dnajb9, dtwd2, edn3, etohi1, fh1, gm10033, gm14288, gm14440, gnat3, grpr, il6ra, ism1, kcnc1, kcnf1, mdn1, mfsd8, mier3, nr1d2, nudt15, omd, omp, p2ry4, per1, pik3r5, pim3, ptch2, rab38, rab6b, slc26a2, slc26a4, slc34a2, slc37a2, slc6a19, tef, tfrc, tle4, tll1, uty, wdr52, zfp273, zfp334, zfp442                                                                                                                                                                                                                                                                        | 1.01E-03 | 2/27  | Neurophysiological process in sweet taste signaling                          |
|                                      |             |                                                                                                                                                                                                                                                                                                                                                                                                                                                                                                                                                                                                                                                                                                    | 1.082E-3 | 2/28  | Neurophysiological process in bitter taste signaling                         |
| Metronidazole at 2 weeks             | Induction   |                                                                                                                                                                                                                                                                                                                                                                                                                                                                                                                                                                                                                                                                                                    | 6.99E-03 | 2/72  | IL-6 signaling pathway via JAK/STAT                                          |
|                                      |             |                                                                                                                                                                                                                                                                                                                                                                                                                                                                                                                                                                                                                                                                                                    |          |       |                                                                              |
|                                      |             |                                                                                                                                                                                                                                                                                                                                                                                                                                                                                                                                                                                                                                                                                                    |          |       |                                                                              |
|                                      | Suppression | Acat2, ccdc134, ccne1, ckap4, gcnt2, lrp8, polr3h, prr15, pxdc1, s100a11, scd2, slc13a1, smpd13b, syt12, tgm2, tmem181a, tmiqd1                                                                                                                                                                                                                                                                                                                                                                                                                                                                                                                                                                    | 1.015E-2 | 1/14  | Nucleocytoplasmic transport of CDK/Cyclins in cell cycle                     |
|                                      |             |                                                                                                                                                                                                                                                                                                                                                                                                                                                                                                                                                                                                                                                                                                    | 1.519E-2 | 1/21  | Cell cycle (generic schema)                                                  |
|                                      |             |                                                                                                                                                                                                                                                                                                                                                                                                                                                                                                                                                                                                                                                                                                    | 1.734E-2 | 1/24  | MIF-JAB1 signaling in immune response                                        |
| Metronidazole at 6 weeks             | Induction   |                                                                                                                                                                                                                                                                                                                                                                                                                                                                                                                                                                                                                                                                                                    |          |       |                                                                              |
|                                      |             |                                                                                                                                                                                                                                                                                                                                                                                                                                                                                                                                                                                                                                                                                                    |          |       |                                                                              |
|                                      | Suppression | 4930539e08rik, abca1, abcg8, acta2, acvr11, add3, adhef1, af529169, afap112, agbl2, aldh1a3, alox15, aoc1, aph1c, arhgef9, arid3a, camsap2, ccdc85c, clic6, cpm, cyp21f2, dgkg, dmin, edn1, egr2, esr1, fam69a, fbp1, fggt, fcho1, gde1, glipr2, gmpr, gpc4, h2-dmb1, hao2, hist1h1c, hist1h4h, hist1h4j, hist2h2bb, igf1r, irs2, itgb8, kcnv2, kif3c, kif11, lifr, limch1, mett17a2, mett17a3, mme, nbl1, npas2, pcsk1n, pde7a, pde7b, plk2, pou6f1, ptpri, rab11fip5, reps2, rgl3, rnf208, rnf1, s100g, s100pbb, sfxn3, slc25a23, slc2a8, slc30a10, slc37a2, slc40a1, spaca6, spag17, sprr2a1, stxbp1, sun2, tgm3, timp3, tmem35, tpm2, trpm6, trpv3, ttbk2, ttc25, upb1, wbscr17, zbtb20, zbtb4 | 1.788E-4 | 3/25  | Putative pathways of hormone action in neurofibromatosis type 1              |
|                                      |             |                                                                                                                                                                                                                                                                                                                                                                                                                                                                                                                                                                                                                                                                                                    | 3.429E-4 | 3/31  | NETosis in SLE                                                               |
| Doxycycline at 2 weeks               | Induction   |                                                                                                                                                                                                                                                                                                                                                                                                                                                                                                                                                                                                                                                                                                    | 1.579E-3 | 3/52  | ECM remodeling in cell adhesion                                              |
|                                      |             |                                                                                                                                                                                                                                                                                                                                                                                                                                                                                                                                                                                                                                                                                                    |          |       |                                                                              |
|                                      |             |                                                                                                                                                                                                                                                                                                                                                                                                                                                                                                                                                                                                                                                                                                    |          |       |                                                                              |
| Doxycycline at 6 weeks               | Induction   | -                                                                                                                                                                                                                                                                                                                                                                                                                                                                                                                                                                                                                                                                                                  | -        | -     | -                                                                            |
|                                      | Suppression | -                                                                                                                                                                                                                                                                                                                                                                                                                                                                                                                                                                                                                                                                                                  | -        | -     | -                                                                            |
| Doxycycline at 2 weeks               | Induction   |                                                                                                                                                                                                                                                                                                                                                                                                                                                                                                                                                                                                                                                                                                    | 3.574E-5 | 2/58  | Role of B cells in SLE                                                       |
|                                      |             | cd28, fcgr2b, mylk4, yod1, zfp367                                                                                                                                                                                                                                                                                                                                                                                                                                                                                                                                                                                                                                                                  | 4.985E-3 | 1/24  | IL-27 signaling pathway                                                      |
|                                      |             |                                                                                                                                                                                                                                                                                                                                                                                                                                                                                                                                                                                                                                                                                                    | 7.265E-3 | 1/35  | Th17 cell differentiation                                                    |
|                                      | Suppression |                                                                                                                                                                                                                                                                                                                                                                                                                                                                                                                                                                                                                                                                                                    | 3.061E-4 | 2/54  | Dynein-dynactin motor complex in axonal transport in neurons                 |
|                                      |             | 1810049j17rik, alad, cuedc1, dynlt1a, itpka, slc2a4, trim15                                                                                                                                                                                                                                                                                                                                                                                                                                                                                                                                                                                                                                        | 1.602E-2 | 1/31  | Influence of low doses of Arsenite on glucose uptake in adipocytes           |
|                                      |             |                                                                                                                                                                                                                                                                                                                                                                                                                                                                                                                                                                                                                                                                                                    | 1.65E-02 | 1/32  | Putative pathways for stimulation of fat cell differentiation by Bisphenol A |
| Doxycycline at 6 weeks               | Induction   |                                                                                                                                                                                                                                                                                                                                                                                                                                                                                                                                                                                                                                                                                                    | 1.857E-2 | 1/20  | Oncostatin M signaling via JAK-Stat in immune response                       |
|                                      |             | Cd46, eml5, esr2, f8, fzd6, inpp5d, lifr, mill2, mme, plekhg1, steap4                                                                                                                                                                                                                                                                                                                                                                                                                                                                                                                                                                                                                              | 2.32E-02 | 1/25  | Apoptotic Activin A signaling in apoptosis and survival                      |
|                                      |             |                                                                                                                                                                                                                                                                                                                                                                                                                                                                                                                                                                                                                                                                                                    | 2.774E-2 | 1/30  | Colorectal cancer (general schema)                                           |

# CIECs microRNA TS/mRNA overlaps - Time

| 6 weeks vs. 2 weeks per treatment | Regulation | microRNA target/ mRNA Overlaps                                                                                                                                | P-Value  | Ratio | Pathways                                                           |
|-----------------------------------|------------|---------------------------------------------------------------------------------------------------------------------------------------------------------------|----------|-------|--------------------------------------------------------------------|
| Water                             | Induction  | Abcg8, acat2, bmx, dclk1, fads1, fam221a, gm28040, gnat2, gpm6a, igsf23, nebl, nme1, pcsk9, mfl186, slc10a2, slc13a1, slc16a9, tm4sf1, tmem132c, upk3b, zfp85 | 3.856E-4 | 2/42  | FXR-regulated cholesterol and bile acids cellular transport        |
|                                   |            |                                                                                                                                                               | 1.949E-2 | 1/27  | Mitochondrial ketone bodies biosynthesis and metabolism            |
|                                   |            |                                                                                                                                                               | 2.164E-2 | 1/30  | Granzyme A signaling in apoptosis and survival                     |
| Seed Oil                          | Induction  |                                                                                                                                                               | 2.143E-2 | 1/26  | S1P2 and S1P3 receptors in cell proliferation and differentiation  |
|                                   |            | Cbx4, cbx8, egr2, eml1, eno3, fgfr3, npr2, nptx1, nr1d2, srf, tmem53, ttc25                                                                                   | 2.306E-2 | 1/28  | Mu-type opioid receptor regulation of proliferation in development |
|                                   |            |                                                                                                                                                               | 2.388E-2 | 1/29  | Delta-type opioid receptor signaling in T-cells in immune response |
